# Supplementary material for: Perovskite quantum dots modulating upconversion nanomaterials For Cancer Early Detections
Source: Research Square preprint supplement (doi:10.21203/rs.3.rs-1972234/v1), 2022-08-24
Supplement: Supplementary file 1 [file df5704170802f737f99df0d8.docx]

**Highlights**

- A new composite material is designed with energy transfer between upconversion nanoparticles and perovskite dots for luminescence sensing.
- Based on the absorption position of the BHQ1 quenching group to modulate the luminescence position of the composite material at 531 nm for detection.
- New upconversion probes are designed and tested for reducing the fluorescence background and enhancing the penetration.
- The upconversion probes are promising for sensitive detection and specific recognition of miRNA-155 for early detection and diagnosis of cancers.
